# Supplementary material for: An HIF-1α/VEGF-A Axis in Cytotoxic T Cells Regulates Tumor Progression
Source: PubMed Central journal article supplement (PMC5691891; doi:10.1016/j.ccell.2017.10.003), 2017-11-13
Supplement: mmc1.pdf [file mmc1.pdf]

**Cancer Cell, Volume 32**

**Supplemental Information**

**An HIF-1 $\alpha$ /VEGF-A Axis in Cytotoxic**

**T Cells Regulates Tumor Progression**

**Asis Palazon, Petros A. Tyrakis, David Macias, Pedro Veliça, Helene Rundqvist, Susan Fitzpatrick, Nikola Vojnovic, Anthony T. Phan, Niklas Loman, Ingrid Hedenfalk, Thomas Hatschek, John Lövrot, Theodoros Foukakis, Ananda W. Goldrath, Jonas Bergh, and Randall S. Johnson**

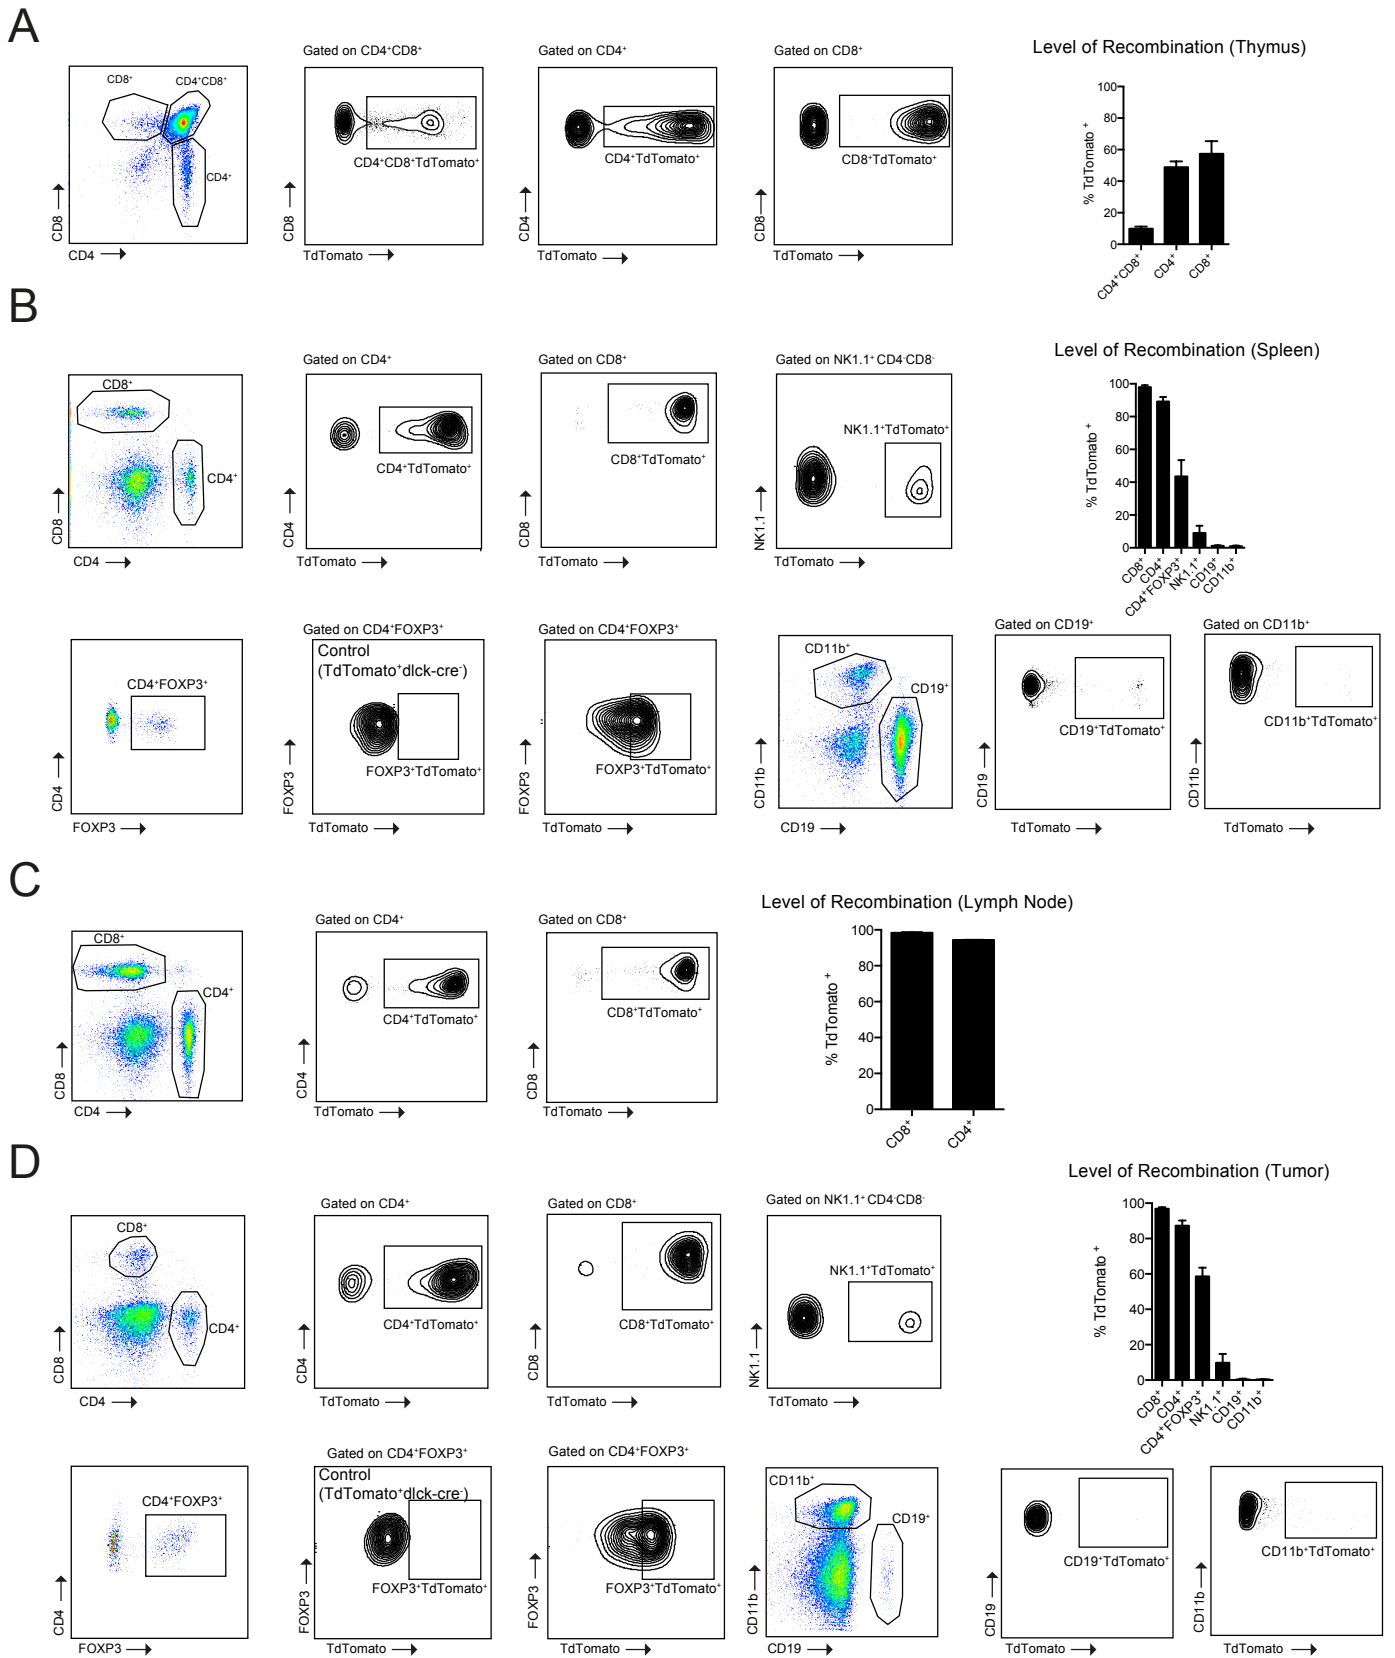

**Figure S1, related to Figure 1.**

(A-D) Level of *dlck-cre* recombination in thymus (A), spleen (B), lymph nodes (C), and subcutaneous LLC tumors (D) ( $n=4$ ) was measured using a TdTomato reporter mouse line by flow cytometry. Error bars represent SD.

**Table S1, related to Figure 1.**

|                                  | Mean pO <sub>2</sub> (mmHg) | SD   |
|----------------------------------|-----------------------------|------|
| Culture media 21% O <sub>2</sub> | 107.38                      | 2.65 |
| Culture media 5% O <sub>2</sub>  | 31.65                       | 0.26 |
| Culture media 1% O <sub>2</sub>  | 10.33                       | 4.25 |
| Spleen                           | 21.73                       | 12.6 |
| Tumor (LLC)                      | 1.95                        | 2.41 |

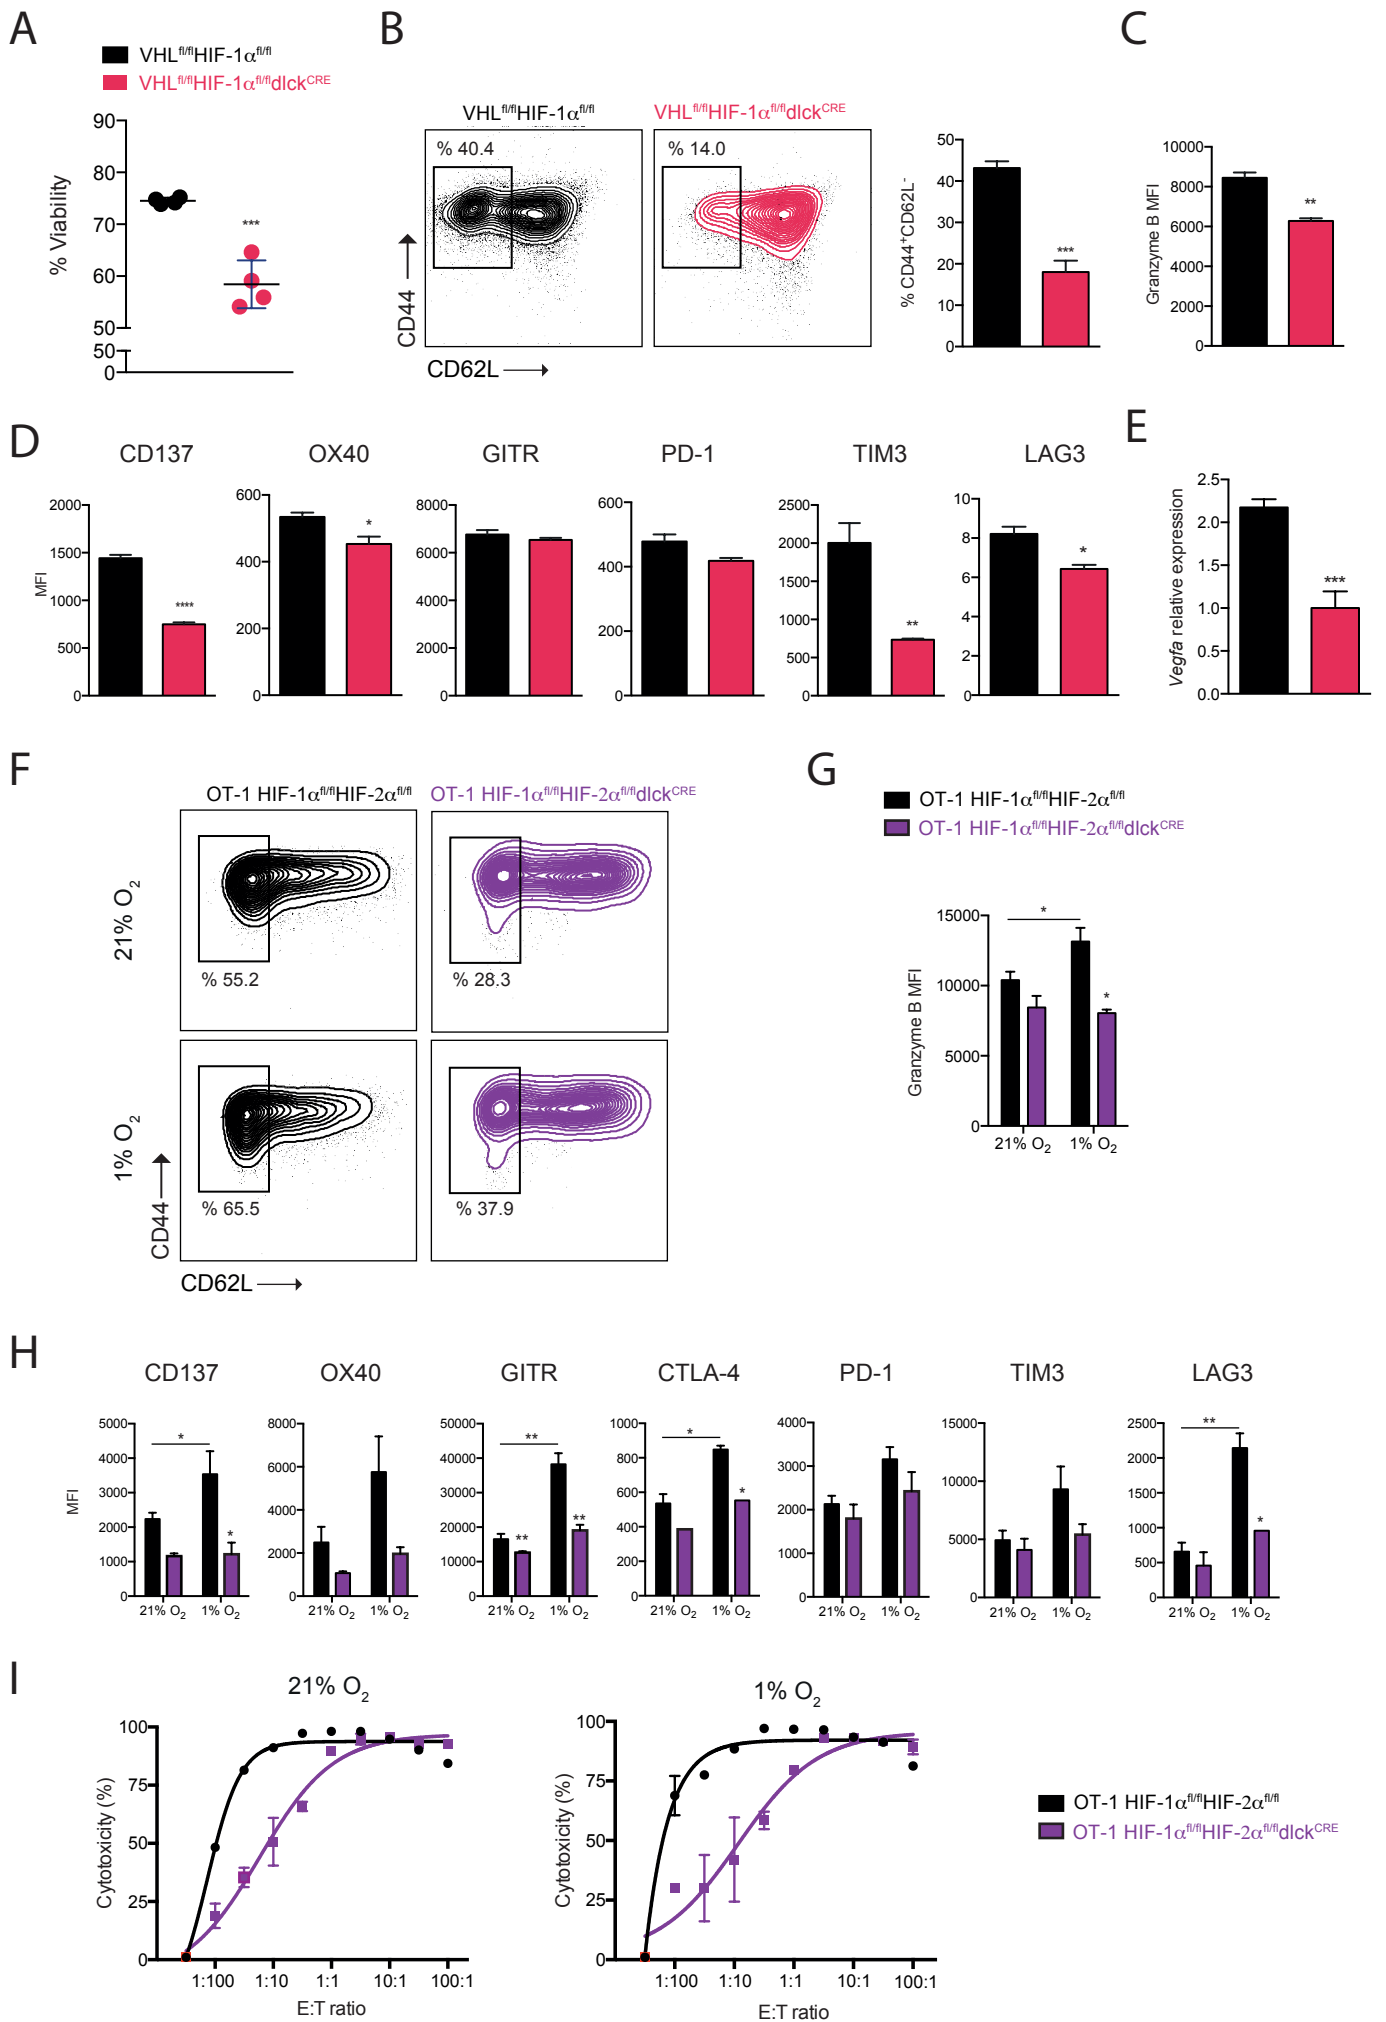

Figure S2, related to Figure 2.

(A-E) CD8<sup>+</sup> T cells were isolated from spleens of VHL<sup>fl/fl</sup>HIF-1 $\alpha$ <sup>fl/fl</sup>dlck<sup>CRE</sup> (pink) and littermate control (black) mice, activated with  $\alpha$ CD3/ $\alpha$ CD28 for 48 hr, and then expanded for 5 days in the presence of IL-2: percent survival (A), expression of CD44 and CD62L by flow cytometry (B), expression of Granzyme B by intracellular flow cytometry (C), surface expression of costimulatory molecules/checkpoint receptors CD137, OX40, GITR, PD-1, TIM-3 and LAG3 by flow cytometry (D) and relative expression of *Vegfa* by QRT-PCR (E), n=4, error bars represent SD. (F-H) CD8<sup>+</sup> T cells were isolated from spleens of OT-1 HIF-1 $\alpha$ <sup>fl/fl</sup>HIF-2 $\alpha$ <sup>fl/fl</sup>dlck<sup>CRE</sup> (purple) and littermate control (black) mice, activated with cognate peptide for 2 days, and then expanded for 5 days in the presence of IL-2 and subjected to 21% or 1% O<sub>2</sub> for 24 hr: expression of CD44 and CD62L by flow cytometry (F) expression of Granzyme B by intracellular flow cytometry (G), expression of the indicated costimulatory molecules/checkpoint receptors by flow cytometry (H), n=4, error bars represent SD. (I) *In vitro* cytotoxicity assay: EG7-OVA target cells and control or mutant OT-1 CD8<sup>+</sup> T cells were co-cultured at different effector to target (E:T) ratios for 24 hr under 21% or 1% O<sub>2</sub> (n=2, error bars represent SE).

**A**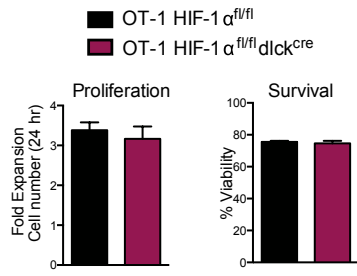**B**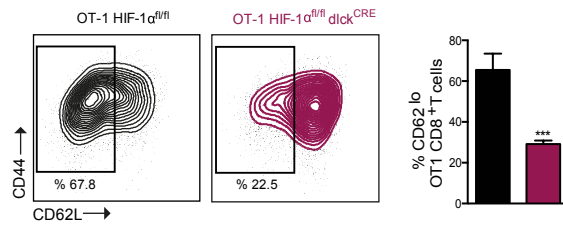**C**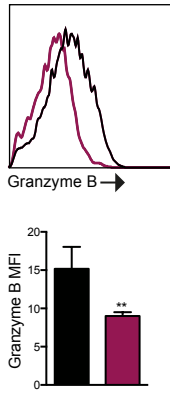**D**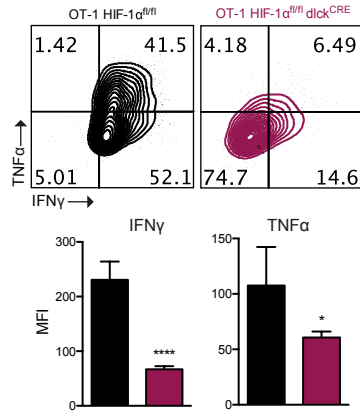**E**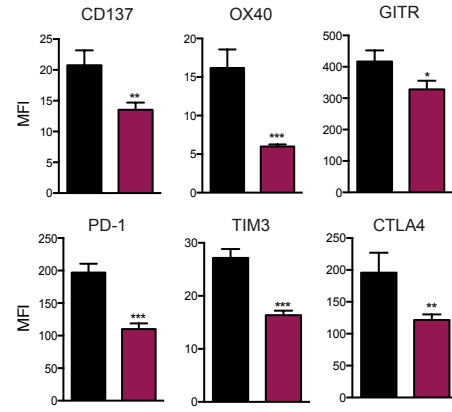

Figure S3, related to Figure 4.

(A-B) Splenic OT-1 cells were activated *in vitro* with cognate SIINF EKL peptide and expanded under 21% O<sub>2</sub> for 3 days in the presence of IL-2: proliferation and survival (A), surface CD62L expression by flow cytometry (B), (n=3, error bars represent SD). (C) Intracellular granzyme B expression (n=3, error bars represent SD). (D) Intracellular TNF $\alpha$  and IFN $\gamma$  expression after 4 hr *in vitro* restimulation with SIINF EKL (n=3, error bars represent SD). (E) Surface expression of costimulatory/checkpoint receptors CD137, OX40, GITR, PD-1 and TIM3 and intracellular expression of CTLA4 (n=3, error bars represent SD). Two-tailed student T test was used for comparisons.

**A**

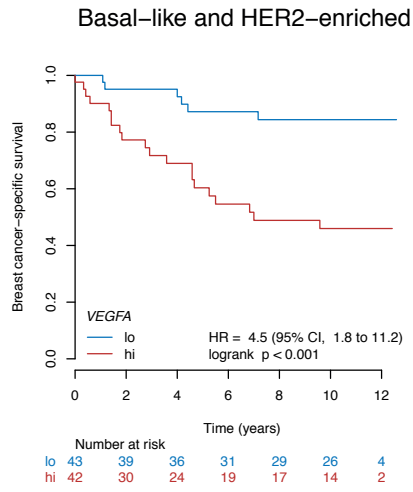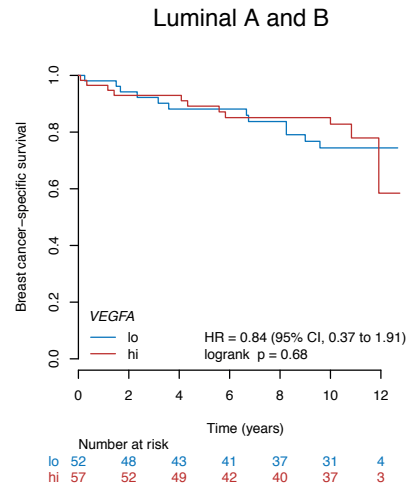

**B**

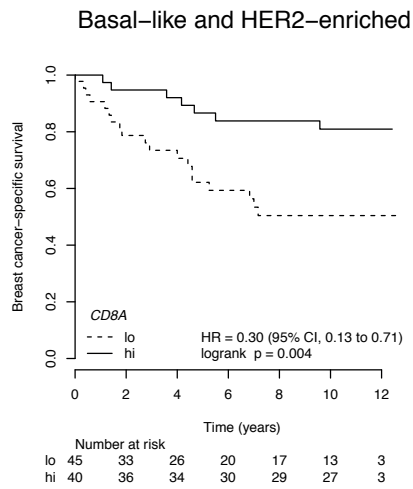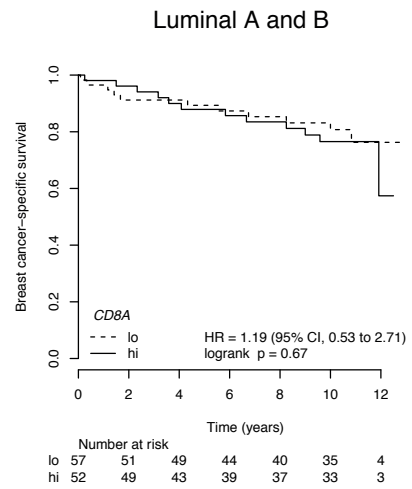

**C**

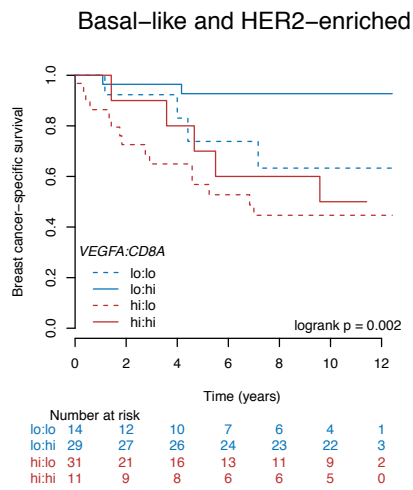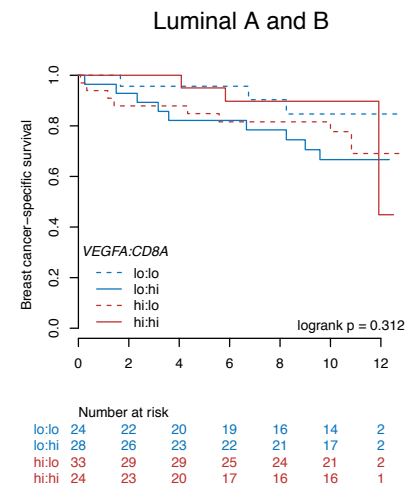



Figure S4, related to Figure 5.

(A-C) Association of *VEGFA* and *CD8A* expression with clinical outcome in the Uppsala cohort. Kaplan-Meyer survival curves of breast-cancer specific survival are shown for the indicated subtypes, for patients classified according to *VEGFA* relative expression levels (A), *CD8A* relative expression levels (B), and different ratios of *VEGFA:CD8A* relative expression levels (C).

**A**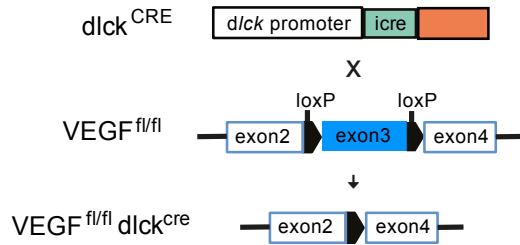**B**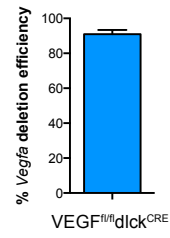**C**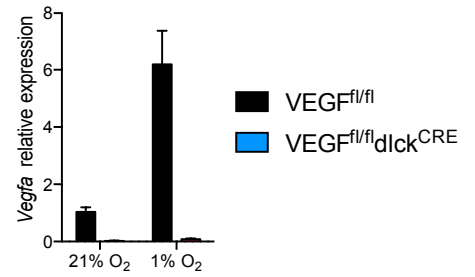**D**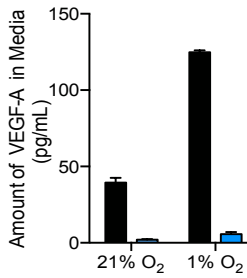**E**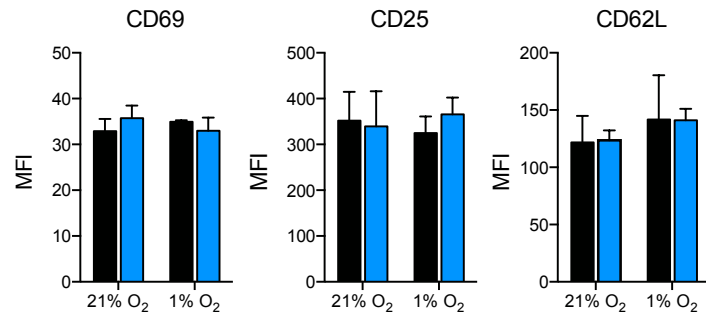**F**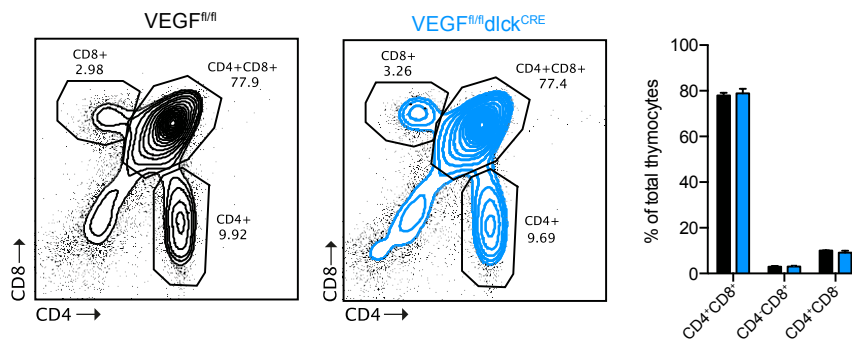**G**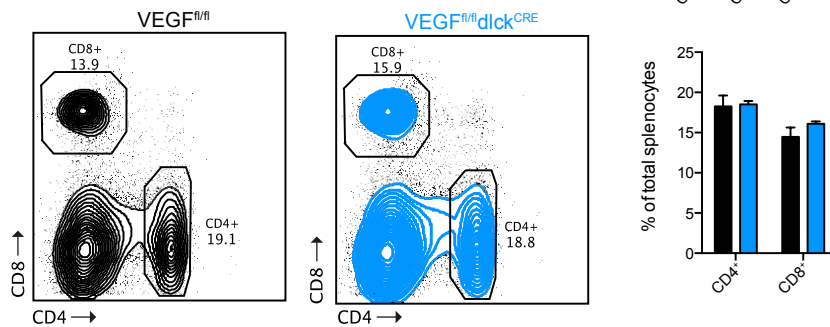**H**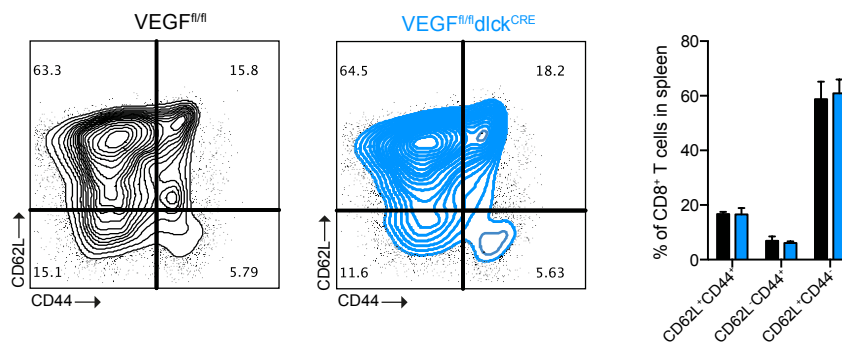

Figure S5, related to Figure 6.

(A) Schematic diagram and gene deletion strategy to generate  $VEGF^{fl/fl}dlck^{CRE}$  mice. (B) Percentage of *Vegfa* deletion efficiency in gDNA from  $CD8^+$  CTLs generated *in vitro* after isolation from  $VEGF^{fl/fl}dlck^{CRE}$  mice (n=4, error bars represent SD). (C) Relative expression of *Vegfa* by QRT-PCR on CTLs from mutant and control mice subjected to 24 hr of culture under 21%  $O_2$  or 1%  $O_2$  (n=4, error bars represent SD). (D) Amount of VEGF-A in media of  $CD8^+$  CTLs cultured as in (C), (n=4, error bars represent SD). (E) Mean fluorescence intensity for the surface expression of CD69, CD25 and CD62L measured by flow cytometry on  $CD8^+$  T cells 48 hr after activation with  $\alpha CD3/\alpha CD28$ . (n=4, error bars represent SD). (F) Thymic composition of mutant mice ( $VEGF^{fl/fl}dlck^{CRE}$ ) and control littermates ( $VEGF^{fl/fl}$ ) (n=4, error bars represent SD). (G) Splenic composition of mutant mice ( $VEGF^{fl/fl}dlck^{CRE}$ ) and control littermates ( $VEGF^{fl/fl}$ ) (n=4, error bars represent SD). (H)  $CD8^+$  T cell composition in spleen of mutant mice ( $VEGF^{fl/fl}dlck^{CRE}$ ) and control littermates ( $VEGF^{fl/fl}$ ) according to CD62L and CD44 expression (n=4, error bars represent SD).

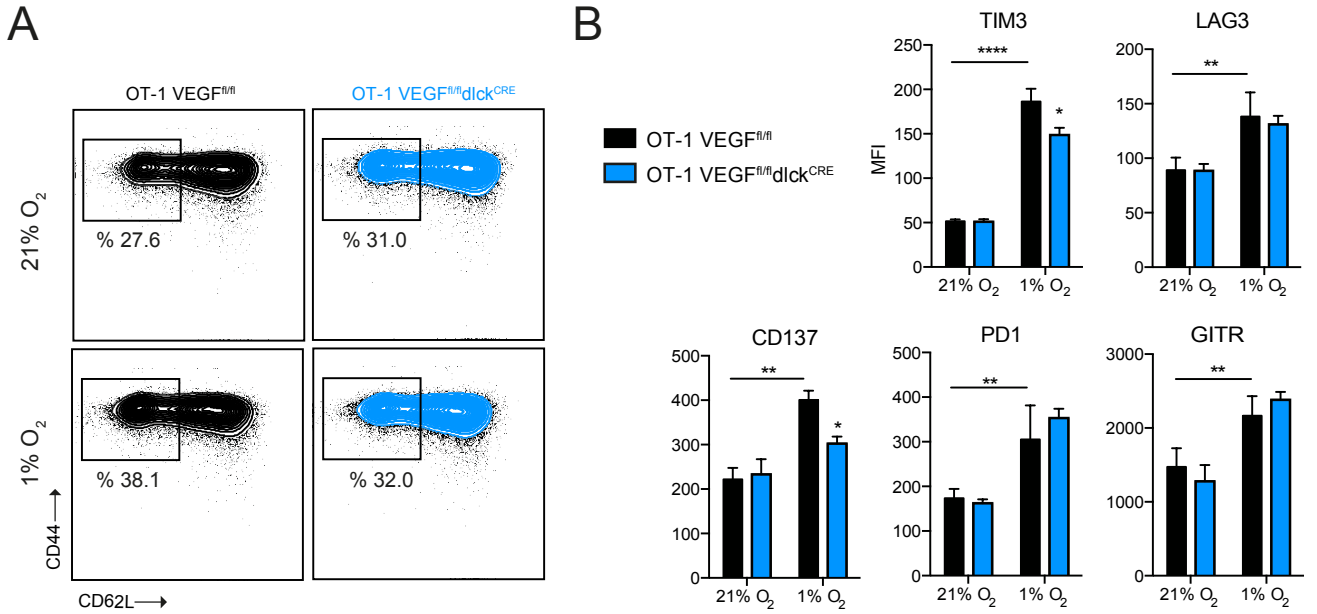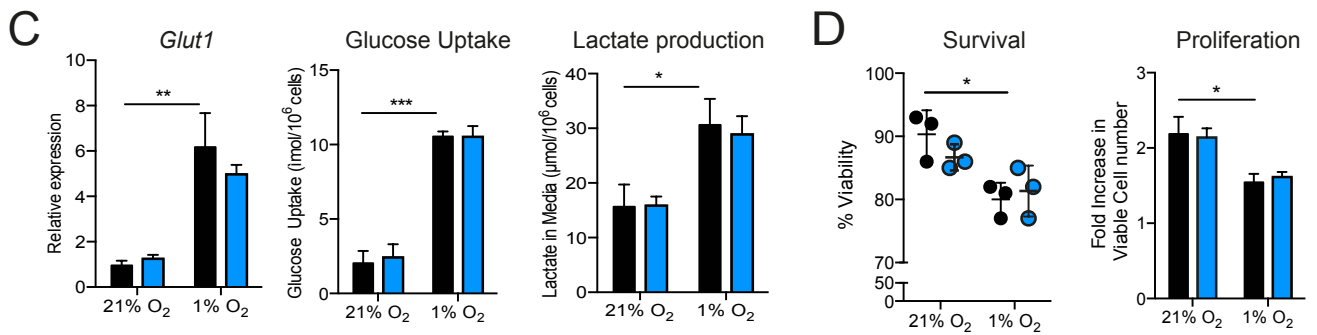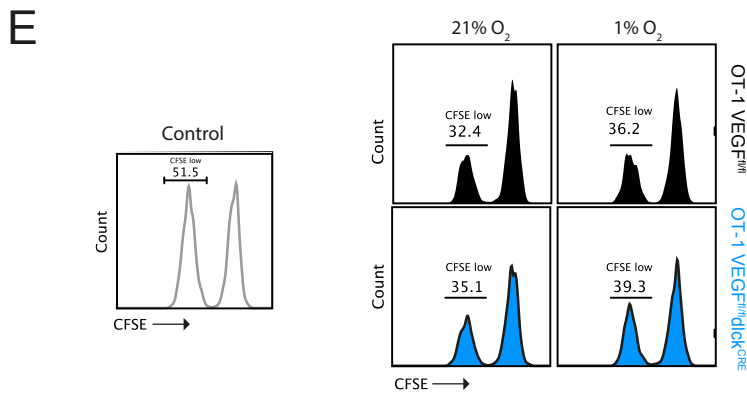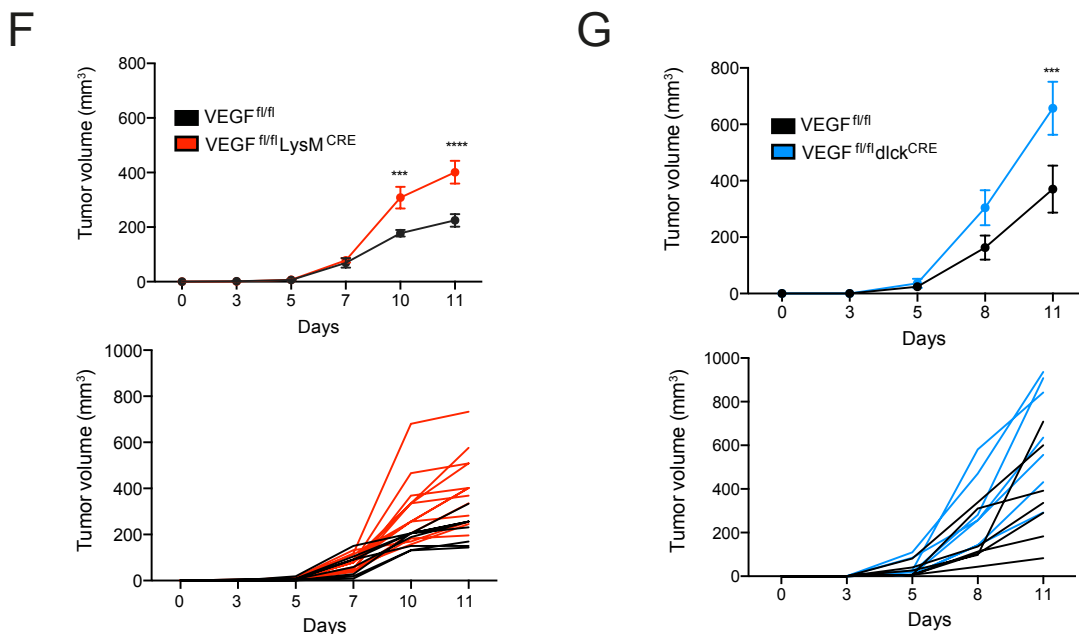

H

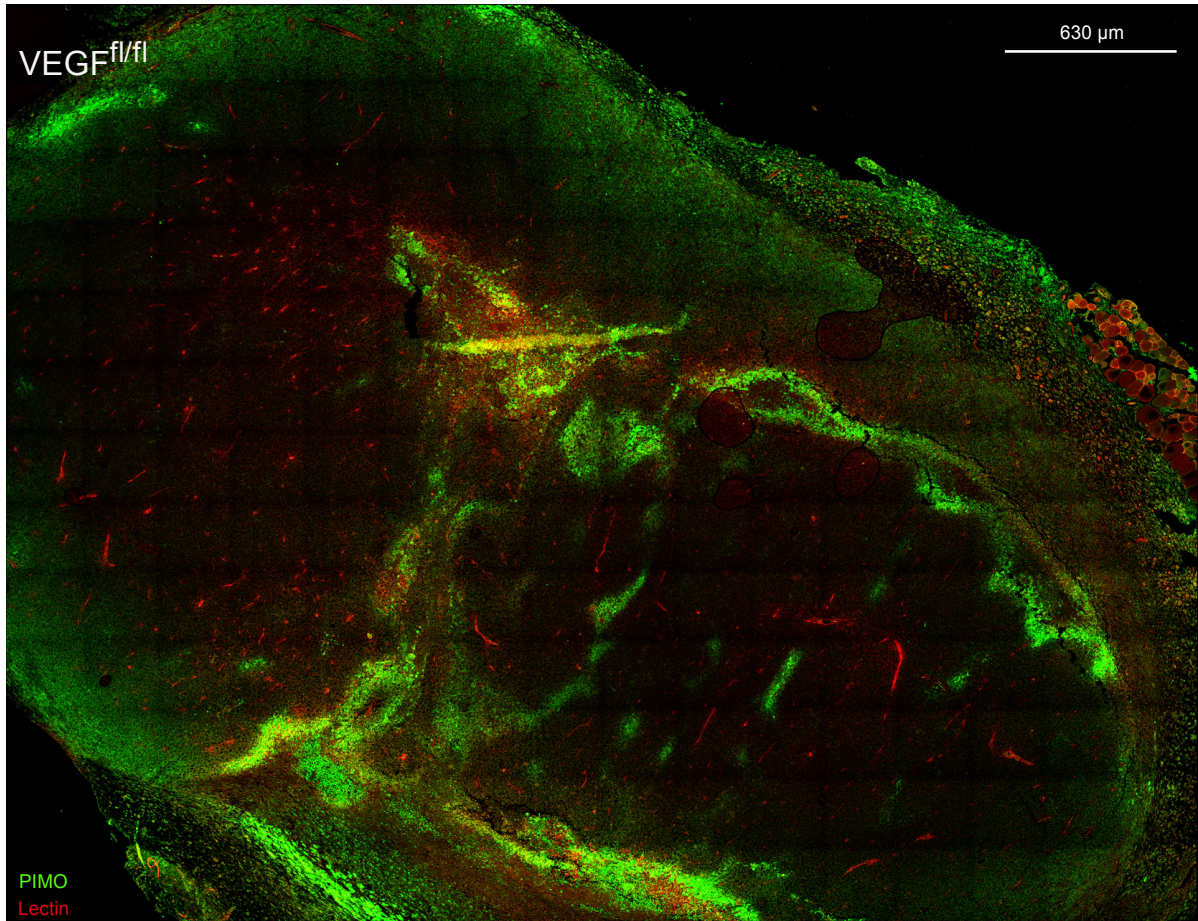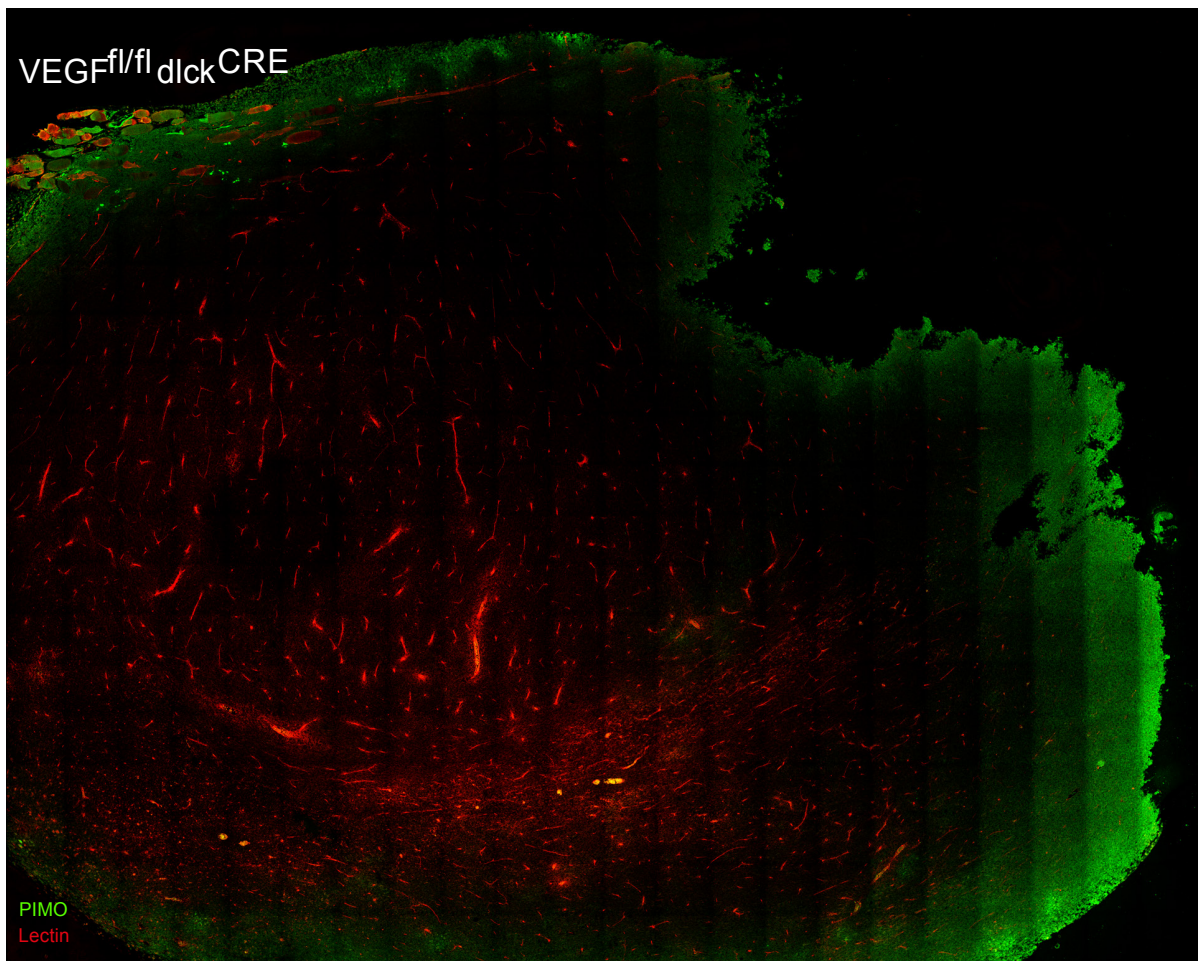

**Figure S6, related to Figure 6**

(A-D) Splenic CD8<sup>+</sup> T cells were isolated from mutant mice (OT-1 VEGF<sup>fl/fl</sup>dlck<sup>CRE</sup>) and control littermates (OT-1 VEGF<sup>fl/fl</sup>), activated *in vitro* with cognate SIINFEKL peptide and expanded in the presence of IL-2 under 21% O<sub>2</sub> for 5 days and subjected to 21% O<sub>2</sub> or 1% O<sub>2</sub> for the last 24 hours: surface CD62L and CD44 expression by flow cytometry (A), surface expression of costimulatory/checkpoint receptors TIM3, LAG3, CD137, PD-1 and GITR (B), relative mRNA expression of Glut-1 on CTLs (C, Left), glucose uptake and lactate production by CTLs with the indicated genotypes (C, Right) and percent survival (D, Left) and proliferation (D, Right). (n=4, error bars represent SD). (E) *In vitro* killing assay: target cells were pulsed with peptide and stained with CFSE<sup>lo</sup> and mixed in equal proportions with unpulsed CFSE<sup>hi</sup> cells. CTLs from mutant or control mice were added to the culture for 4 hours and % of CFSE<sup>+</sup> cells were quantified by flow cytometry. (F-G) Representative growth curves of subcutaneously injected LLC tumors in VEGF<sup>fl/fl</sup>LysM<sup>CRE</sup> (red, n=13) (F) and VEGF<sup>fl/fl</sup>dlck<sup>CRE</sup> (blue, n=7) (G). VEGF<sup>fl/fl</sup> littermate controls are shown in black, (0.5x10<sup>6</sup> tumor cells/mouse). Error bars represent SEM, statistical analysis was performed by two-way ANOVA with Sidak correction for multiple comparisons. (H) Representative immunofluorescence images from LLC tumors for the indicated genotypes (Green= pimonidazole, Red= Tomato lectin-Dylight-594).

**Table S2, related to STAR Methods. Primers for qRT-PCR.**

| Gene         | Forward primer               | Reverse primer                 |
|--------------|------------------------------|--------------------------------|
| <i>Rn18s</i> | 5'-CGGCGACGACCCATTCGAAC-3'   | 5'-GAATCGAACCCCTGATTCCCCGTC-3' |
| <i>Hprt</i>  | 5'- TCAGTCAACGGGGGACATAAA-3' | 5'- GGGGCTGTACTGCTTAACCAG-3'   |
| <i>Pgk1</i>  | 5'-ATTCTGCTTGGACAATGGAGC-3'  | 5'-AGGCATGGGAACACCATCA-3'      |
| <i>Hk2</i>   | 5'-TGATCGCCTGCTTATTCACGG-3'  | 5'-AACCGCCTAGAAATCTCCAGA-3'    |
| <i>Pdk1</i>  | 5'-GAAGCAGTTCCTGGACTTCG-3'   | 5'-CCAACCTTGCACCAGCTGTA-3'     |
| <i>Vegfa</i> | 5'-CCACGTCAGAGAGCAACATCA-3'  | 5'-TCATTCTCTCTATGTGCTGGCTTT-3' |
| <i>Mct4</i>  | 5'-TCACGGGTTTCTCCTACGC-3'    | 5'-GCCAAAGCGGTTACACAC-3'       |
| <i>Hif1a</i> | 5'-GAAACGACCACTGCTAAGGCA-3'  | 5'-GGCAGACAGCTTAAGGCTCCT-3'    |
| <i>Epas1</i> | 5'-CAACCTGCAGCCTCAGTGT-3'    | 5'-CACCACGTCGTTCTTCTCGA-3'     |

**Table S3, related to STAR Methods. Primers for determining deletion efficiency.**

|                      |                                                       |
|----------------------|-------------------------------------------------------|
| <i>Actb</i> Forward  | 5'-AGAGGGAAATCGTGCGTGA-3'                             |
| <i>Actb</i> Reverse  | 5'-CAATAGTGATGACCTGGCCGT-3'                           |
| <i>Actb</i> Probe    | 5'-[6-FAM] CACTGCCGCATCCTCTTCCTC [BHQ1a-Q]-3'         |
| <i>Vegfa</i> Forward | 5'-TGACCATCTGCTTTCGTGACC-3'                           |
| <i>Vegfa</i> Reverse | 5'-ACTTGTTGCAGGCAGCGG-3'                              |
| <i>Vegfa</i> Probe   | 5'-[6-FAM] TGCTCCCTGGGCTCGACAGGG [BHQ1a-Q]-3'         |
| <i>Hif1a</i> Forward | 5' GGTGCTGGTGTCCAAAATGTAG 3'                          |
| <i>Hif1a</i> Reverse | 5' ATGGGTCTAGAGAGATAGCTCCACA 3'                       |
| <i>Hif1a</i> Probe   | 5' [6-FAM] CCTGTTGGTTGCGCAGCAAGCATT [BHQ1a-Q] 3'      |
| <i>Hif2a</i> Forward | 5' TCTATGAGTTGGCTCATGAGTTG 3'                         |
| <i>Hif2a</i> Reverse | 5' GTCCGAAGGAAGCTGATGG 3'                             |
| <i>Hif2a</i> Probe   | 5' [6-FAM] CCACCTGGA/ZEN/CAAAGCCTCCATCAT [3IABkFQ] 3' |
